# Supplementary material
Source: PubMed Central journal article supplement (PMC6643098)
Supplement: mmc1.pdf [file mmc1.pdf]

Target flanking sequence 1

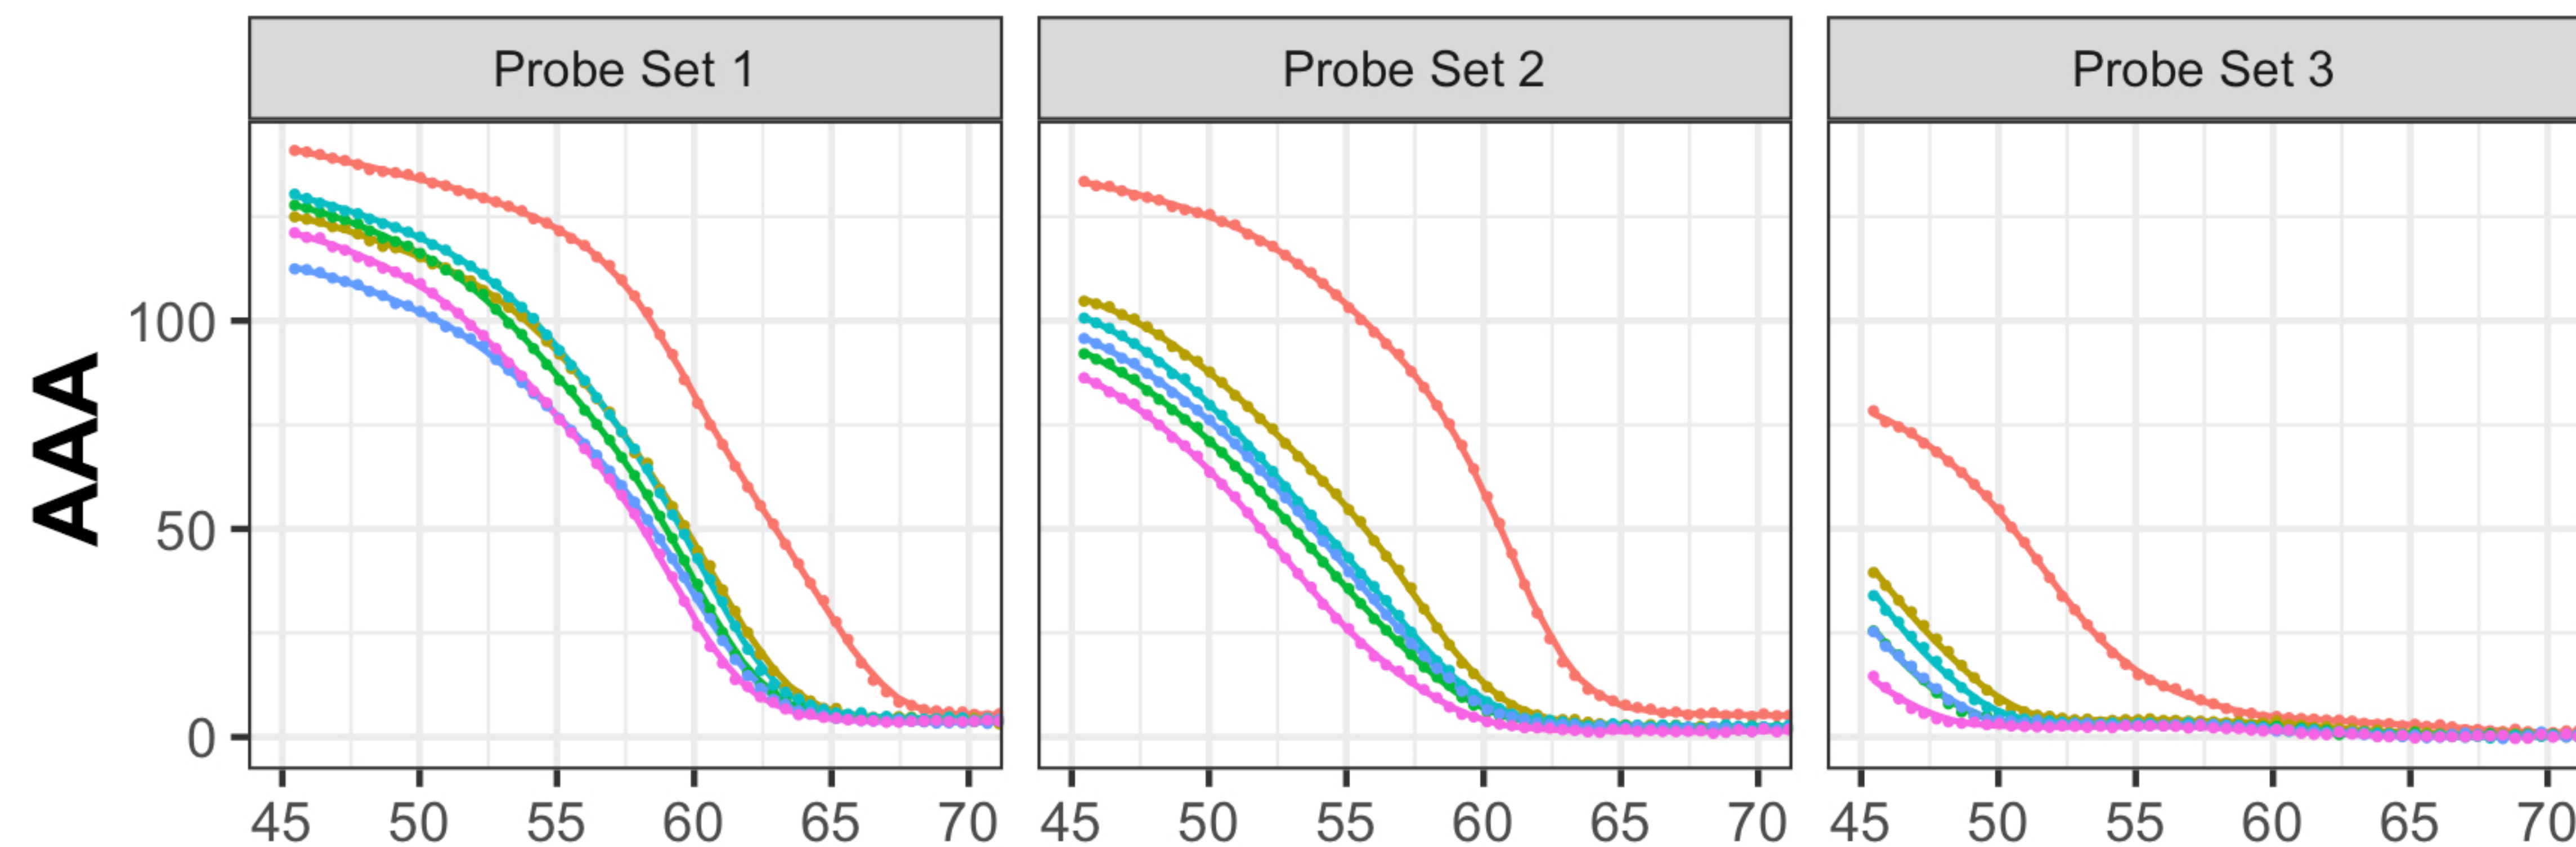

Target flanking sequence 2

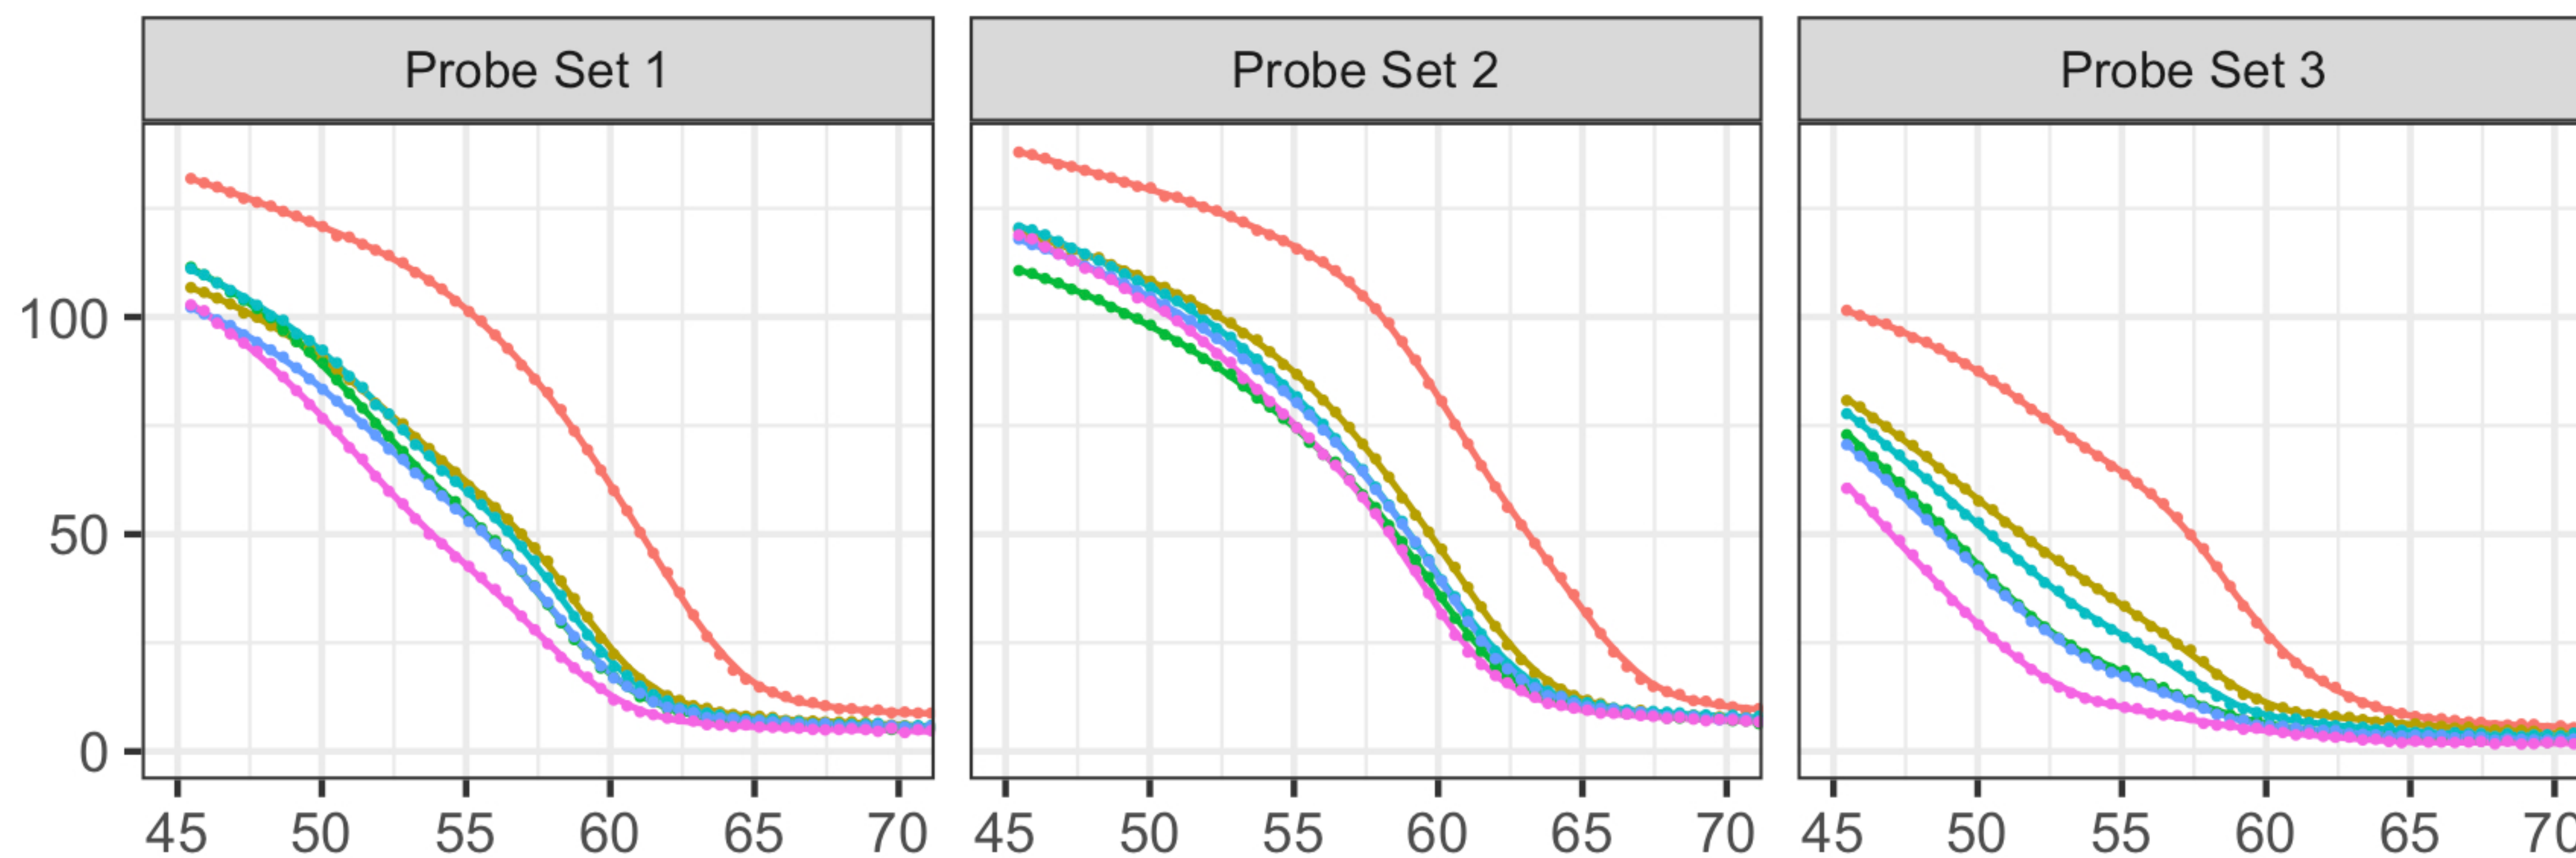

Target flanking sequence 3

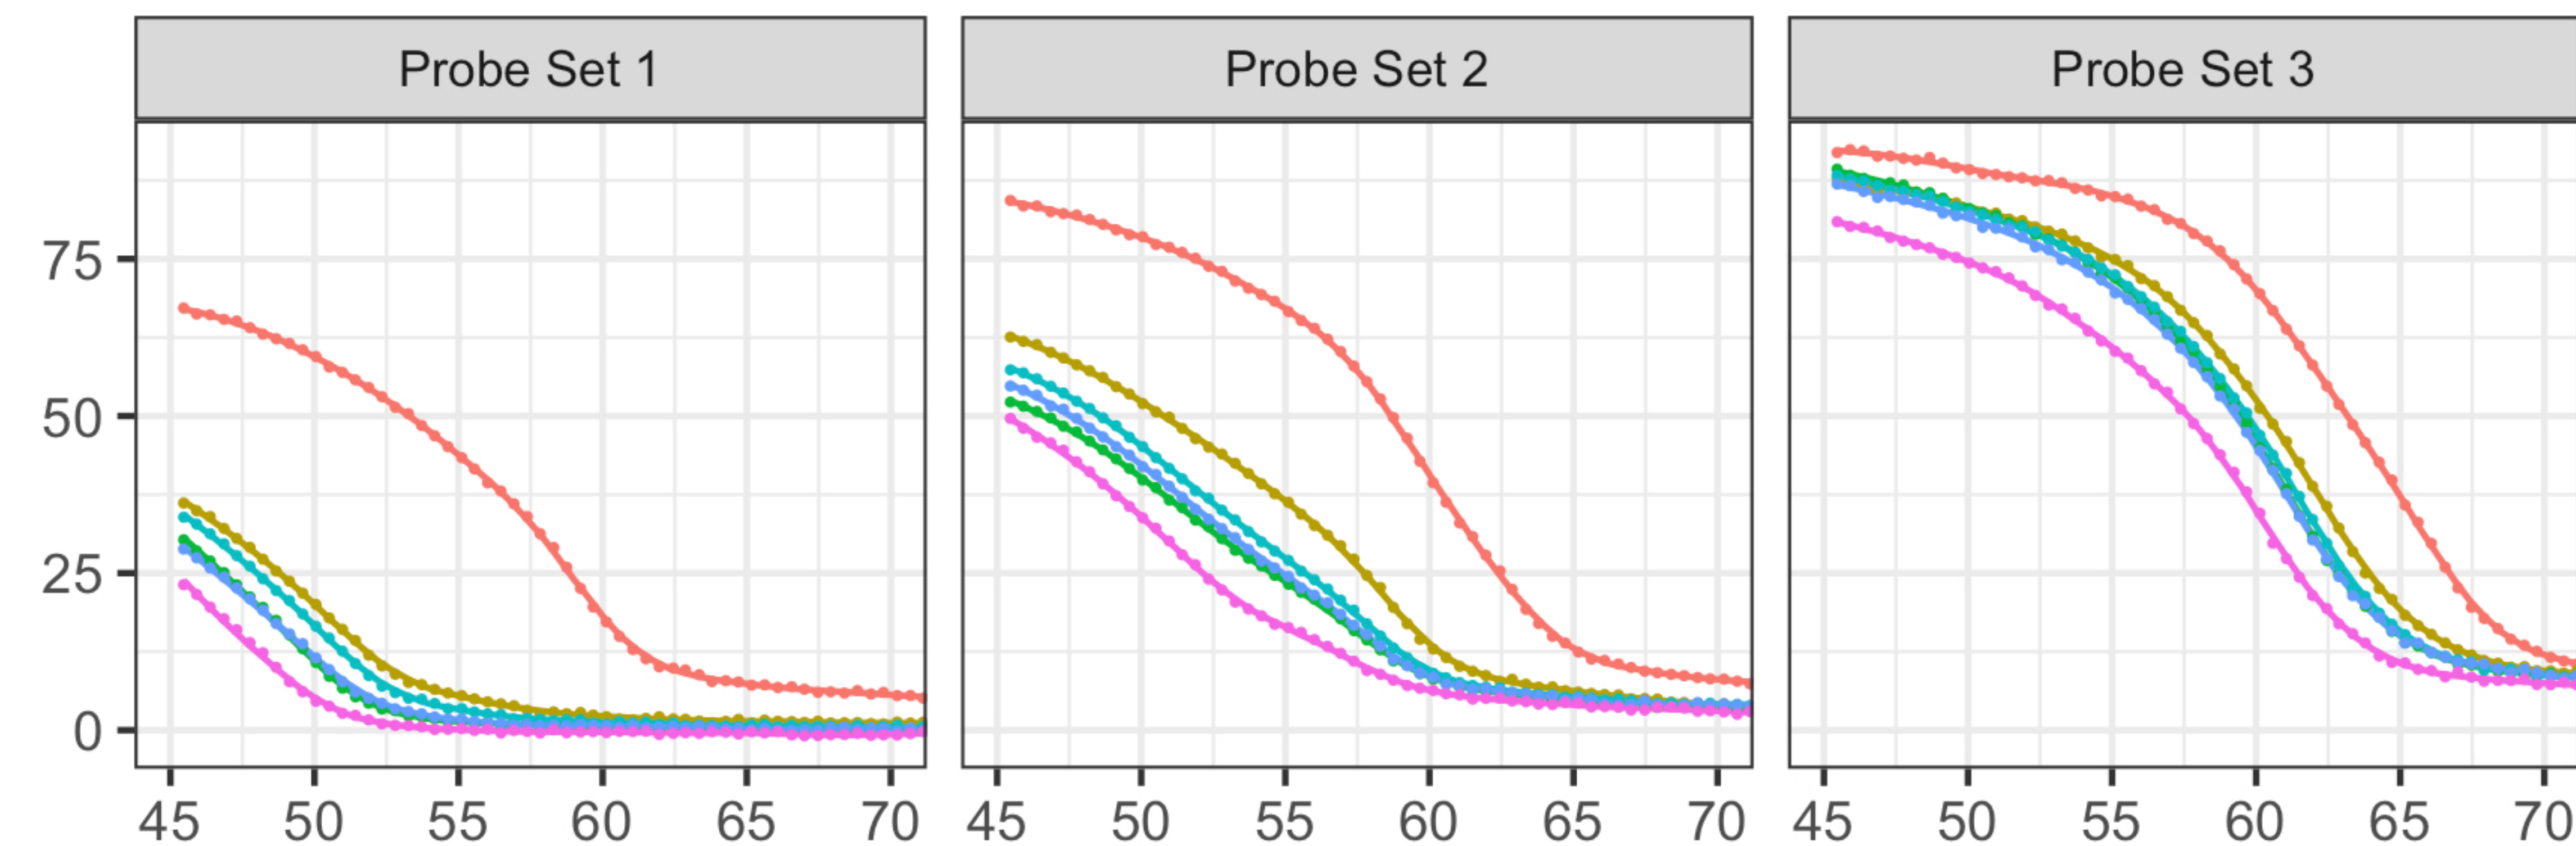

Target Codon

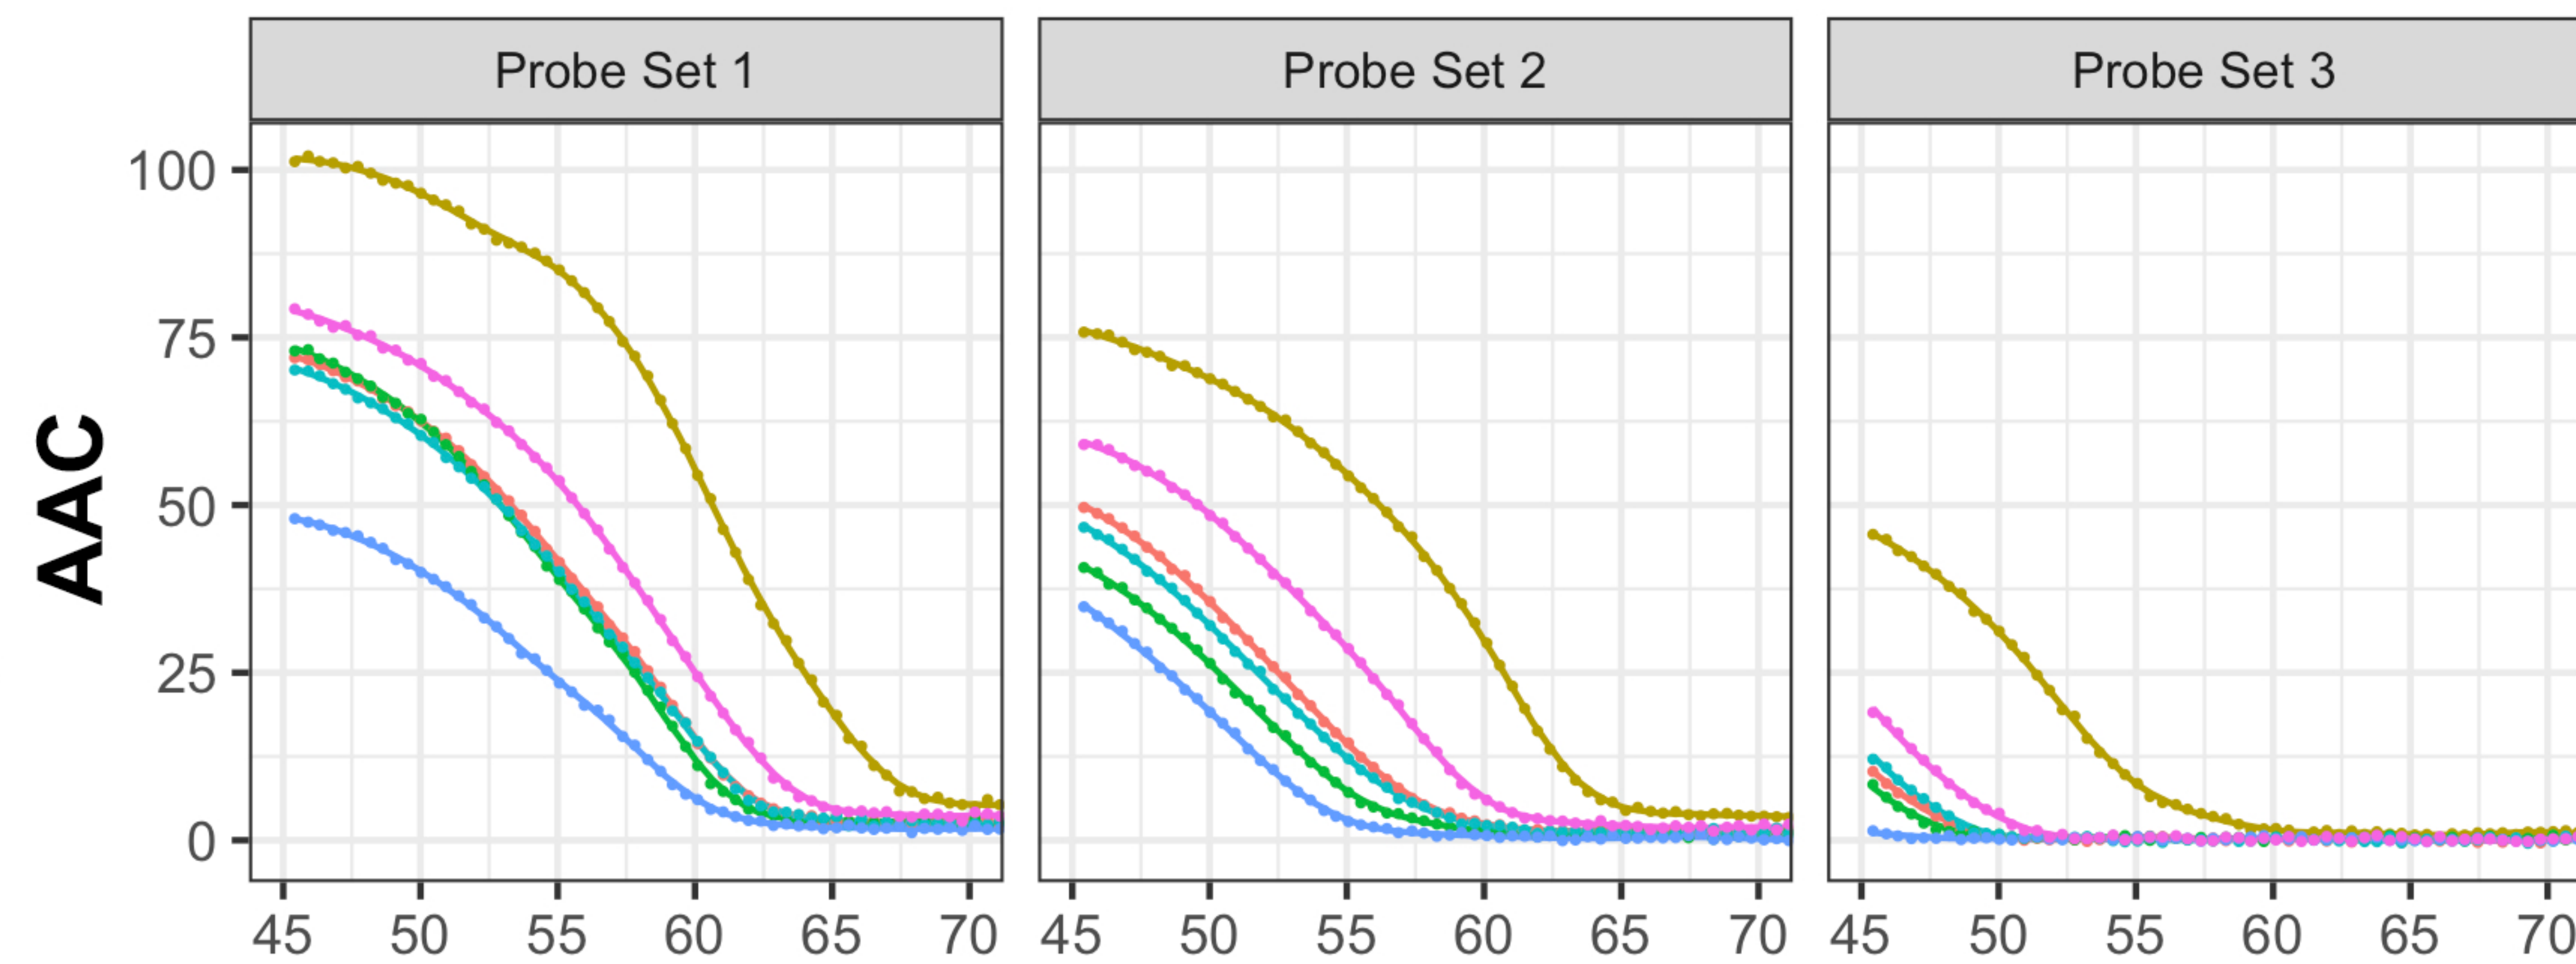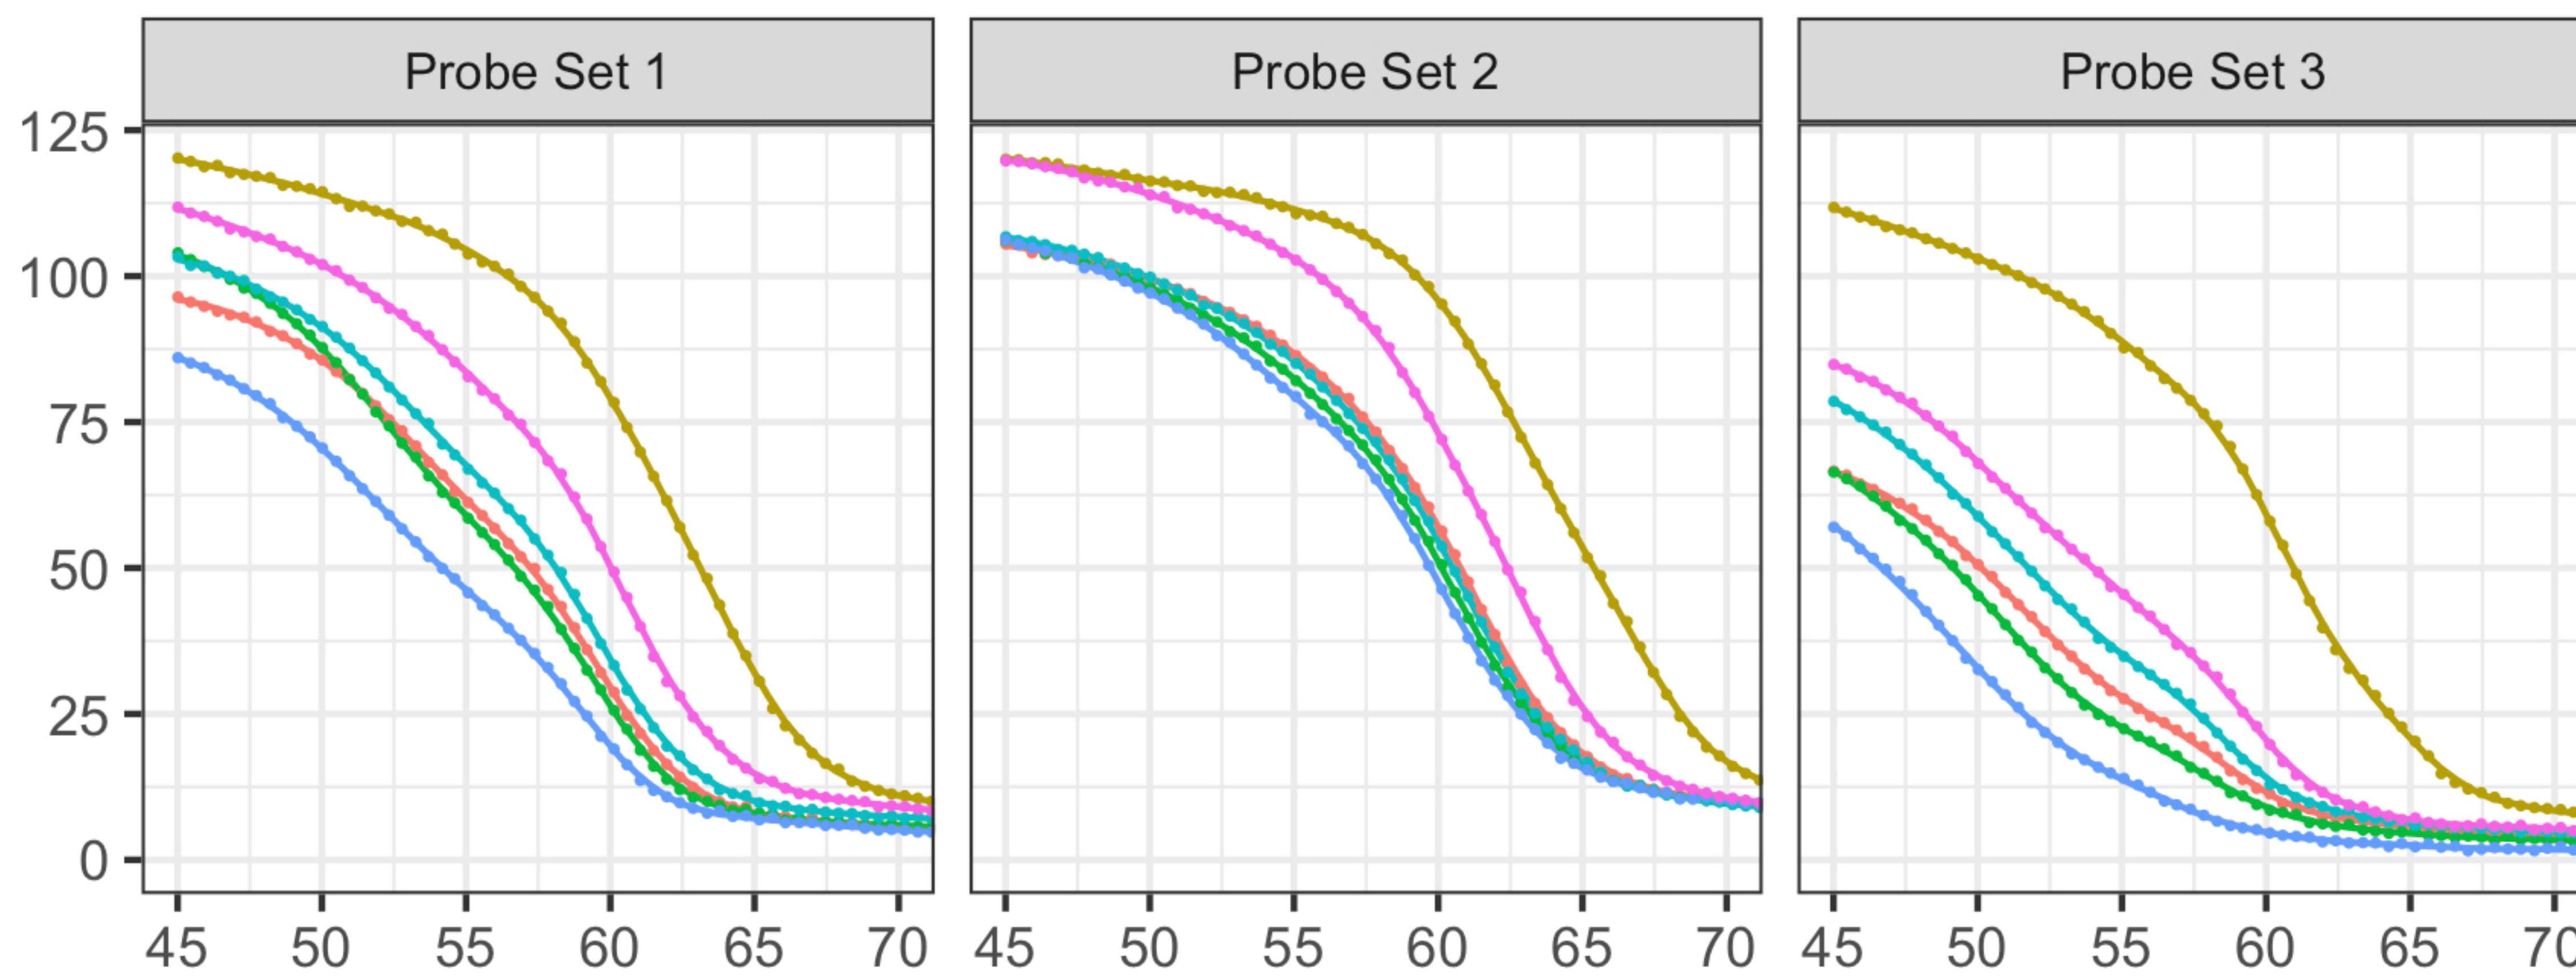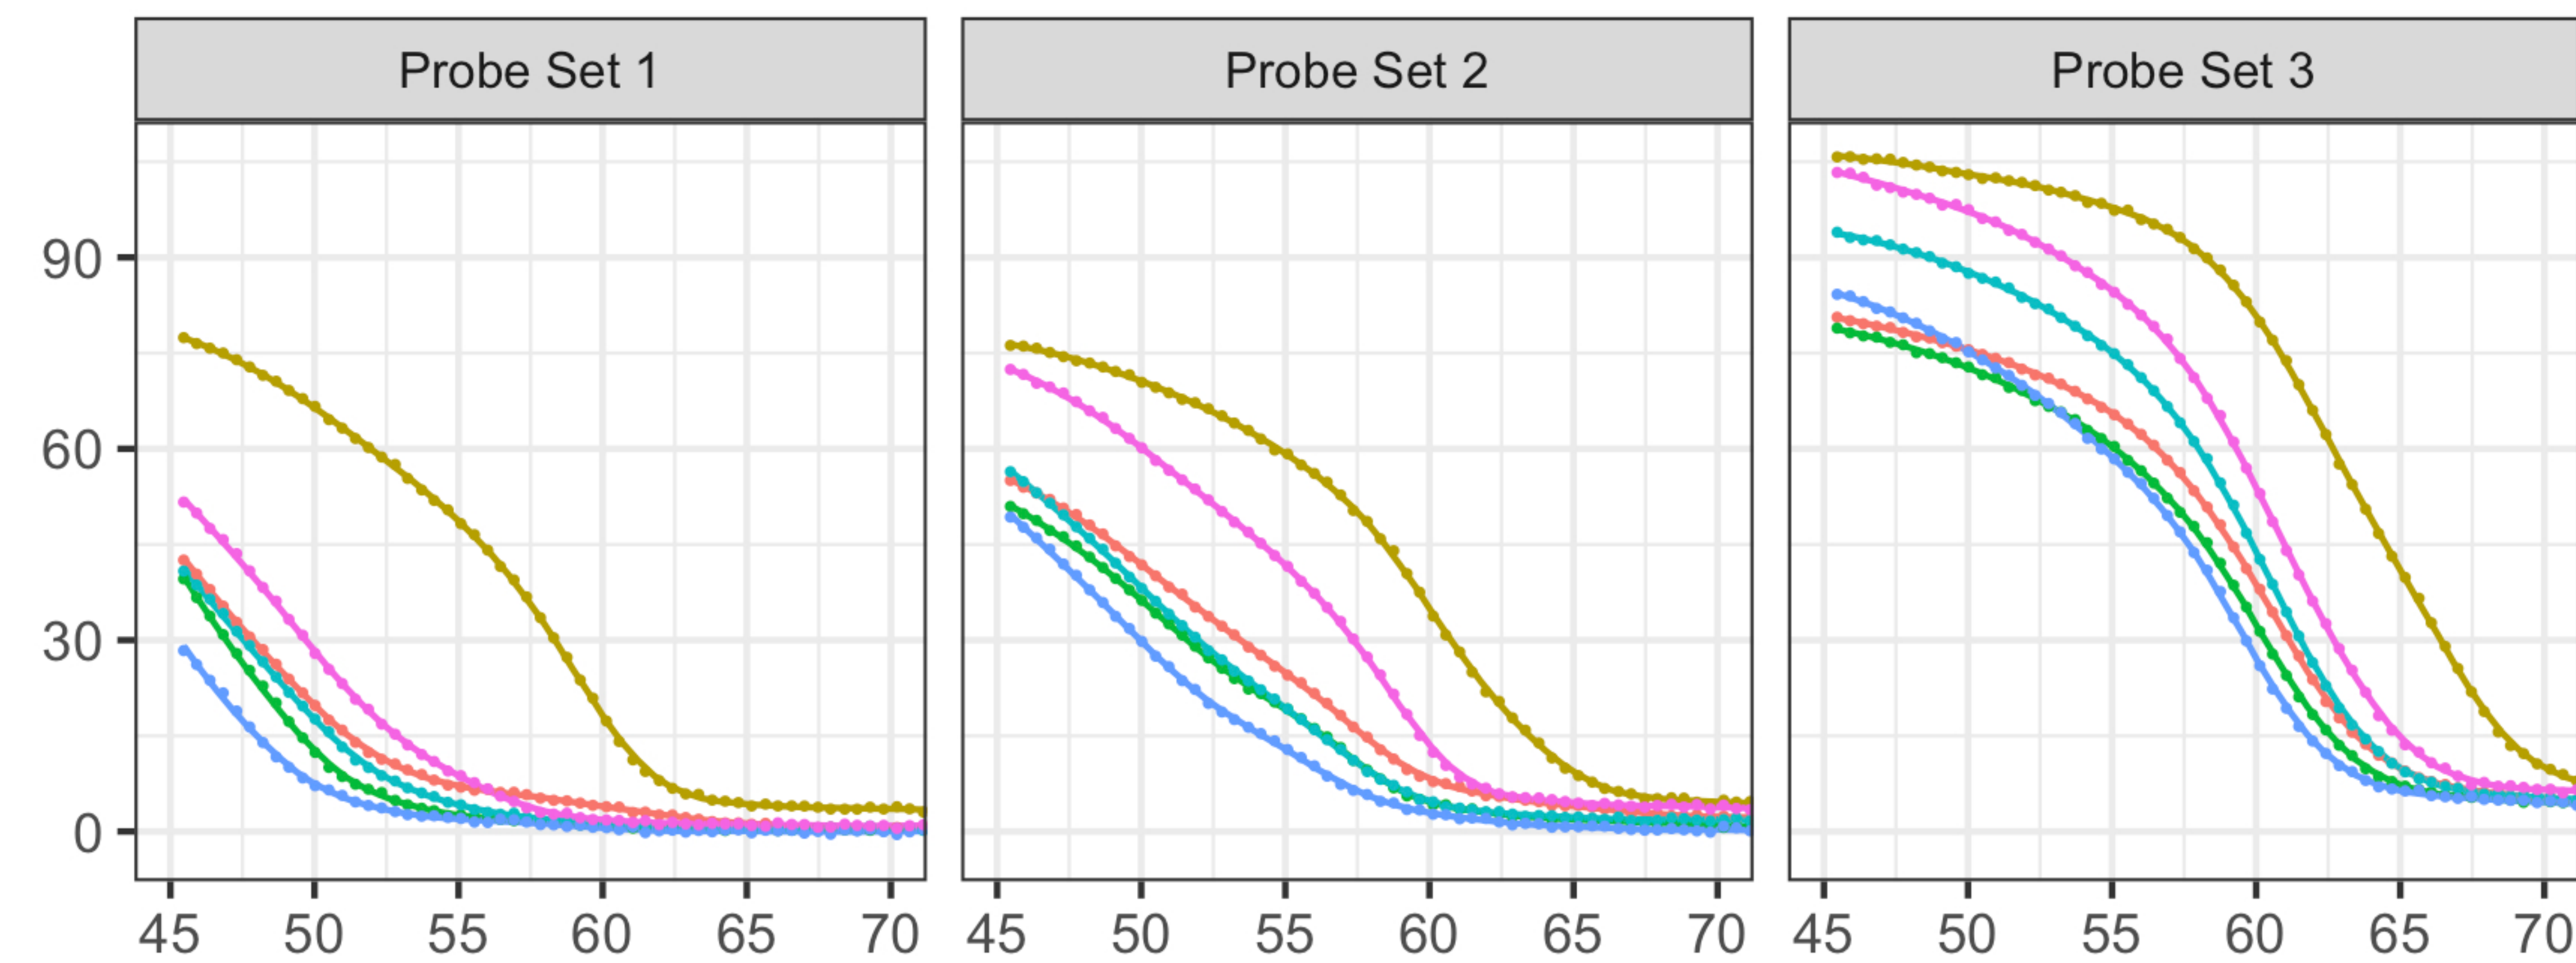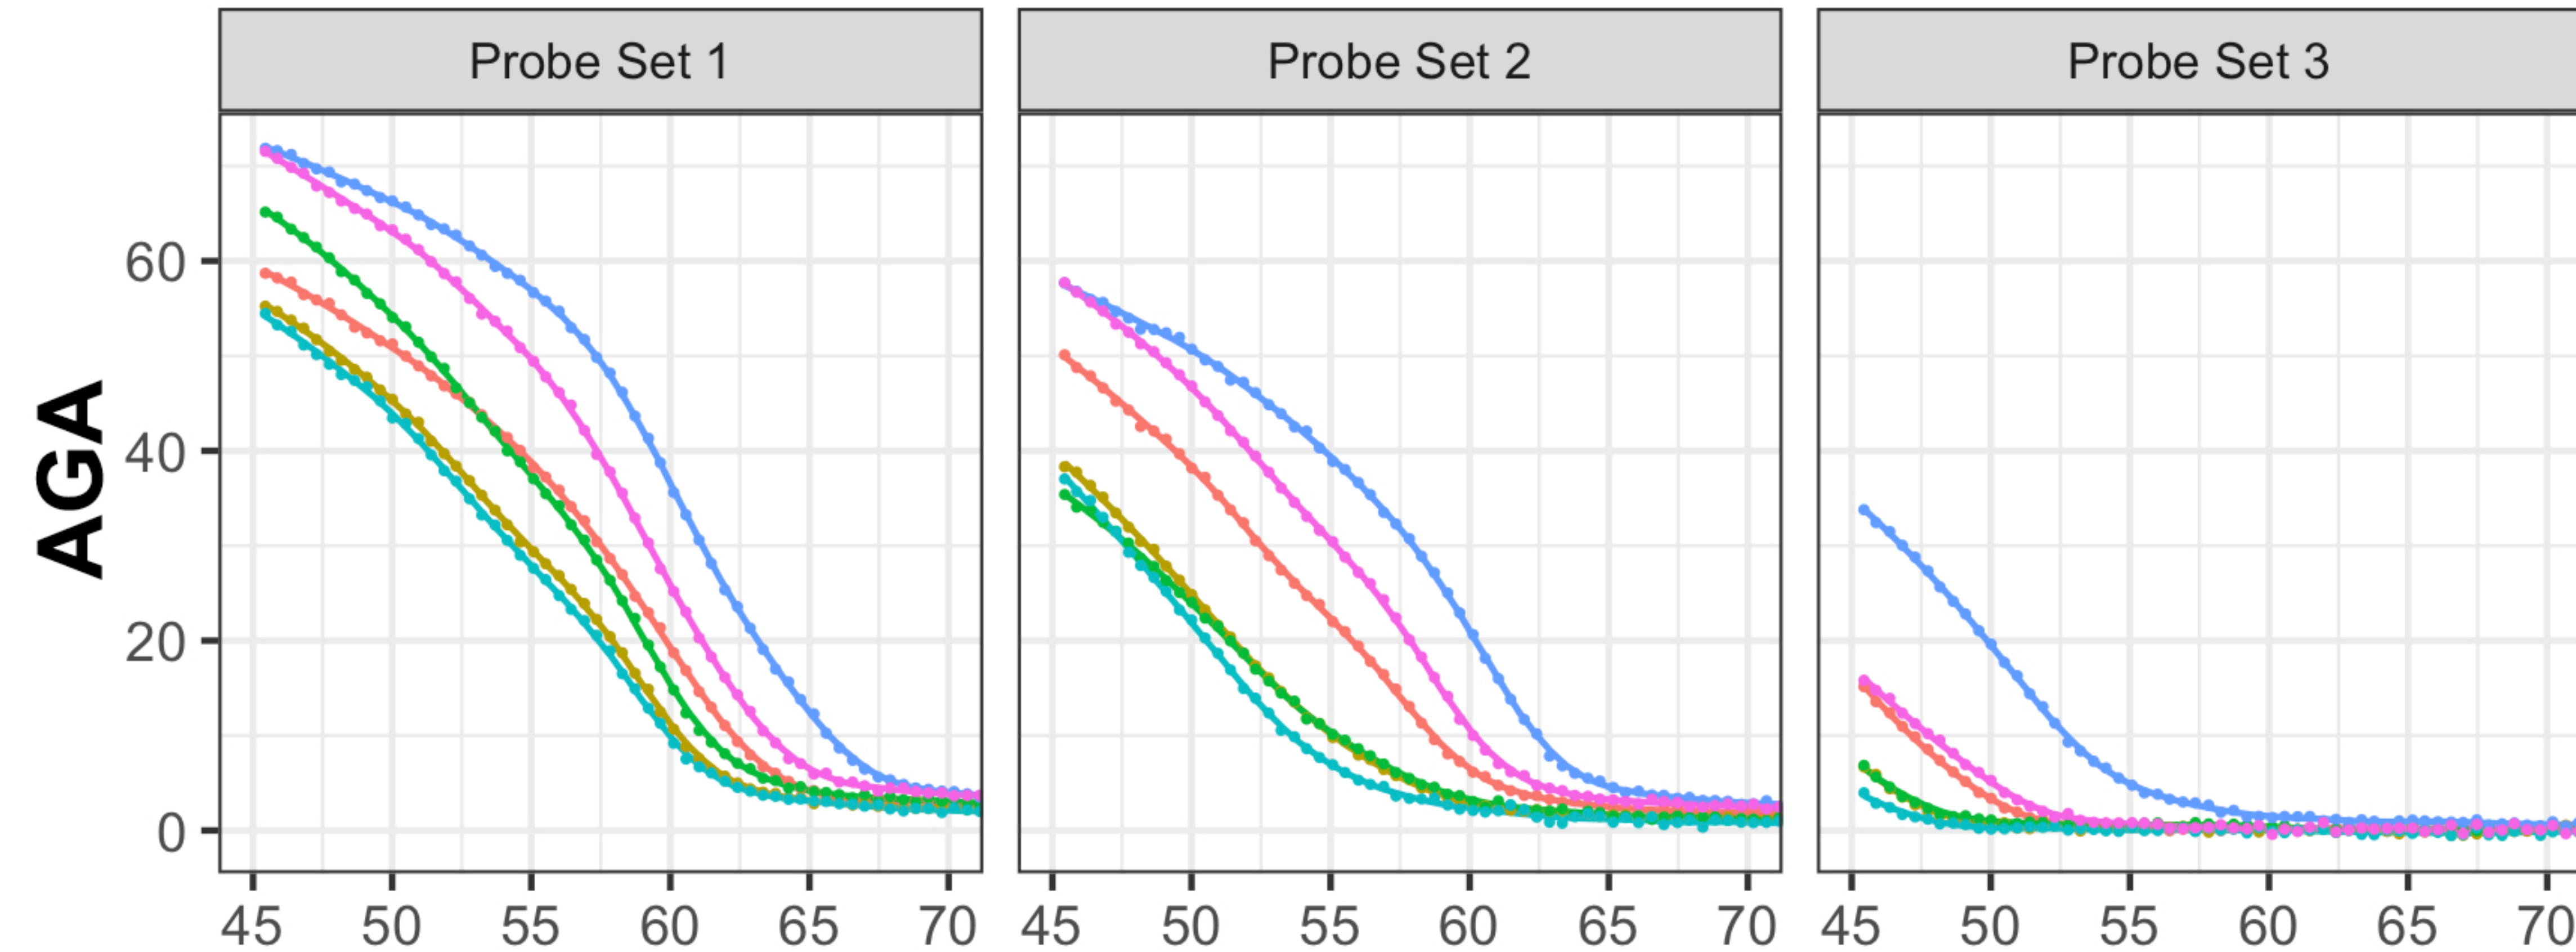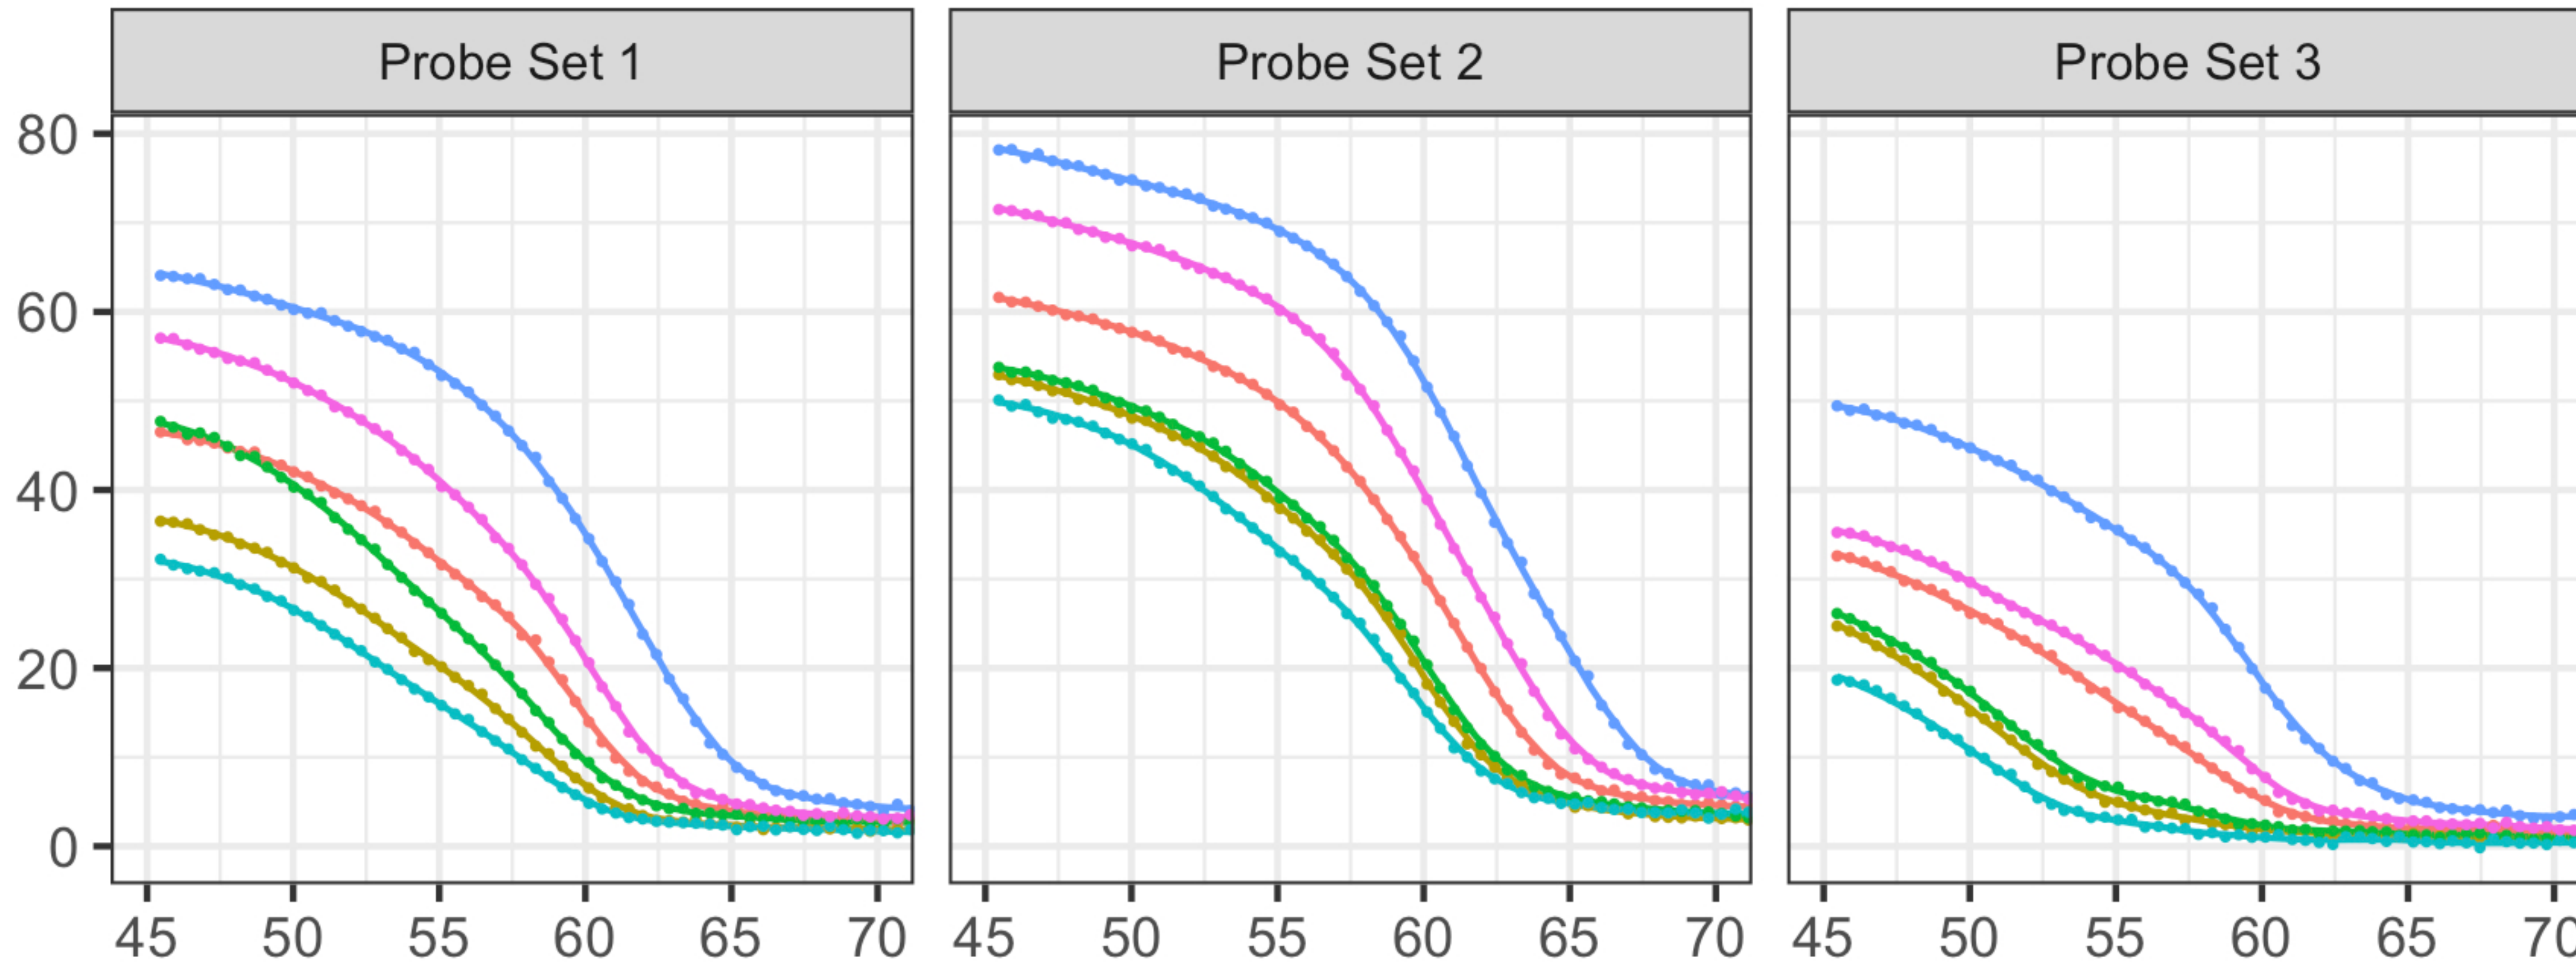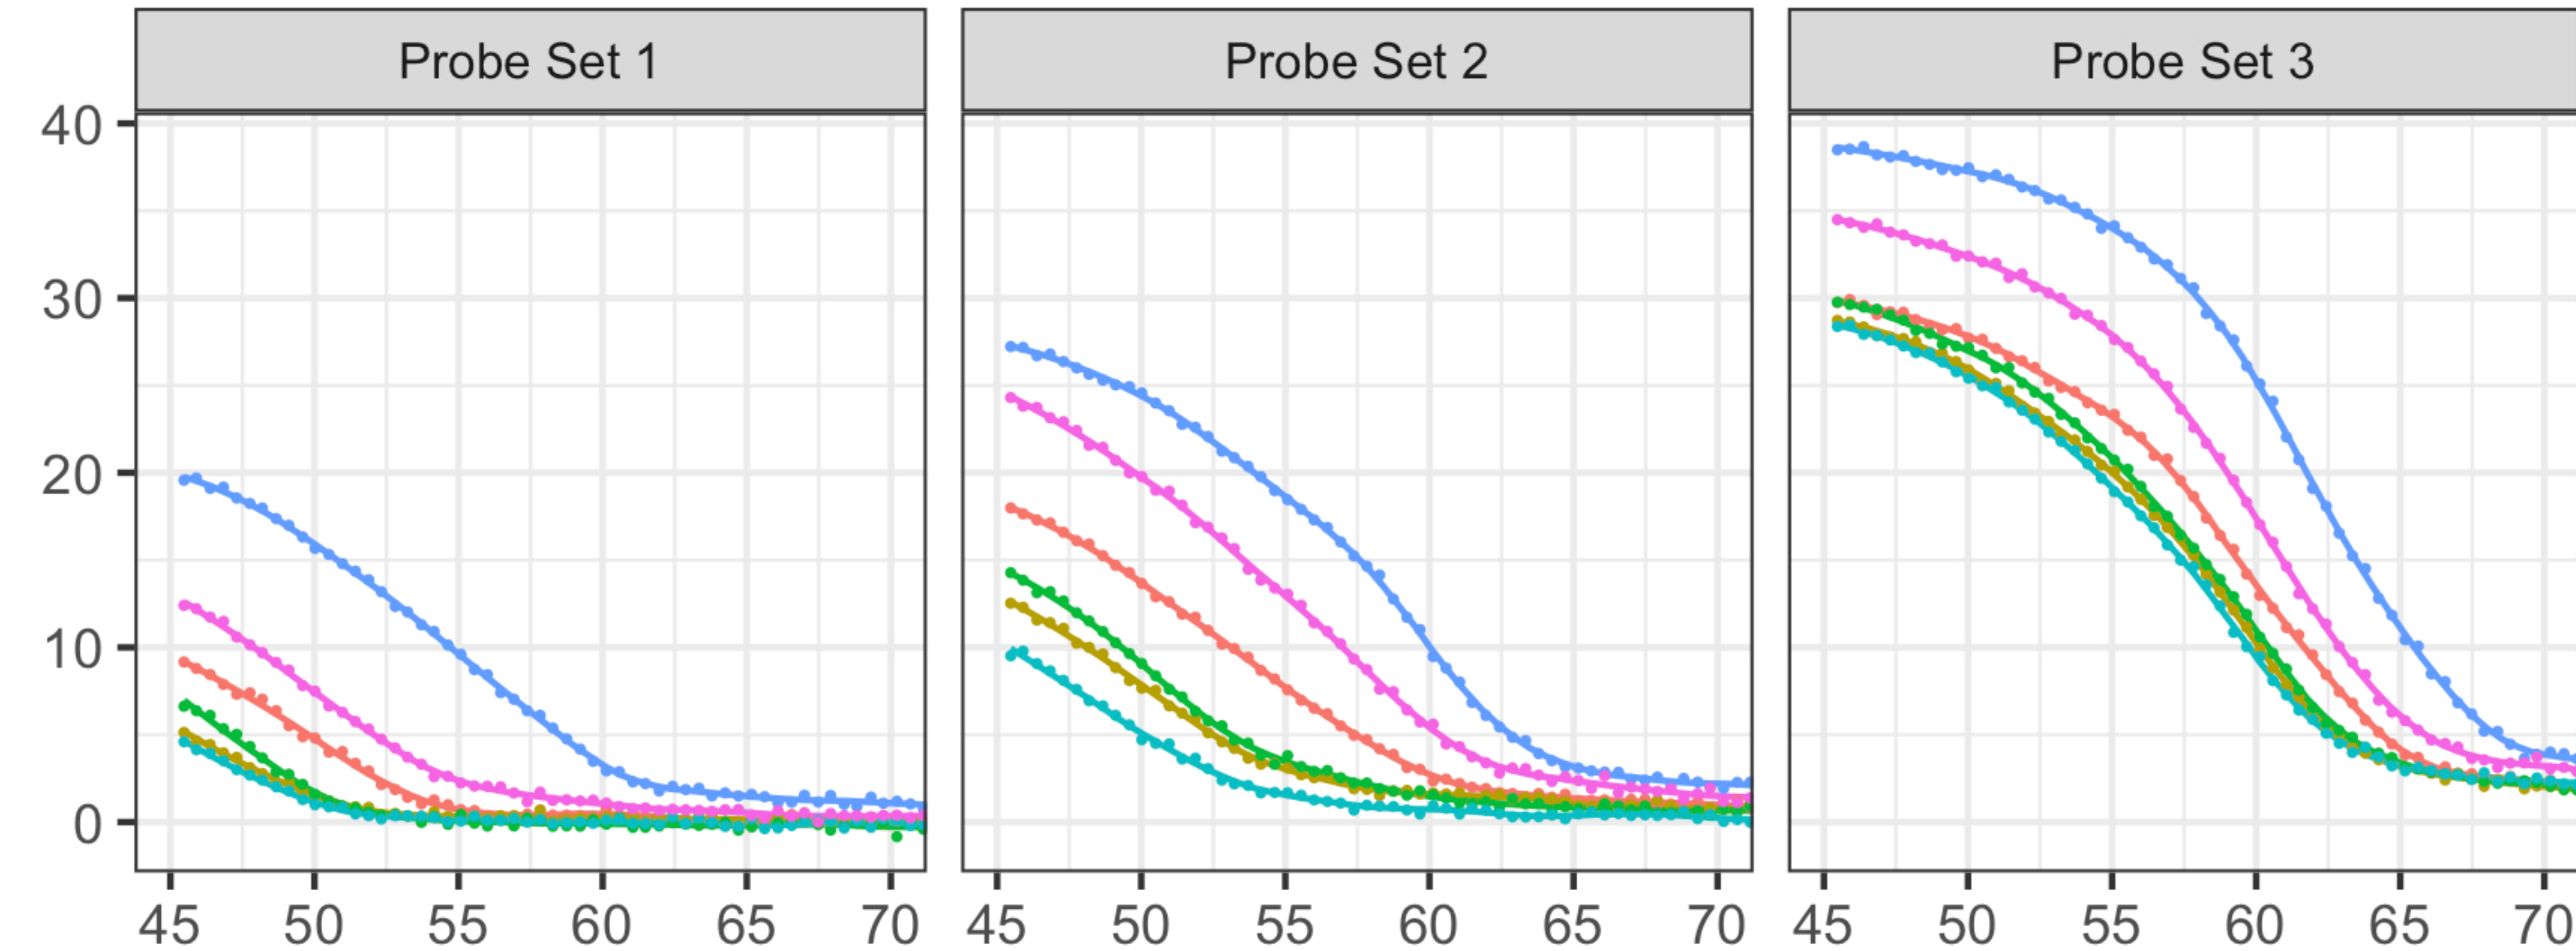

Temperature (°C)
