# Supplementary material
Source: PubMed Central journal article supplement (PMC6643098)

Target flanking sequence 1

Target flanking sequence 2

Target flanking sequence 3

Target Codon Mixture

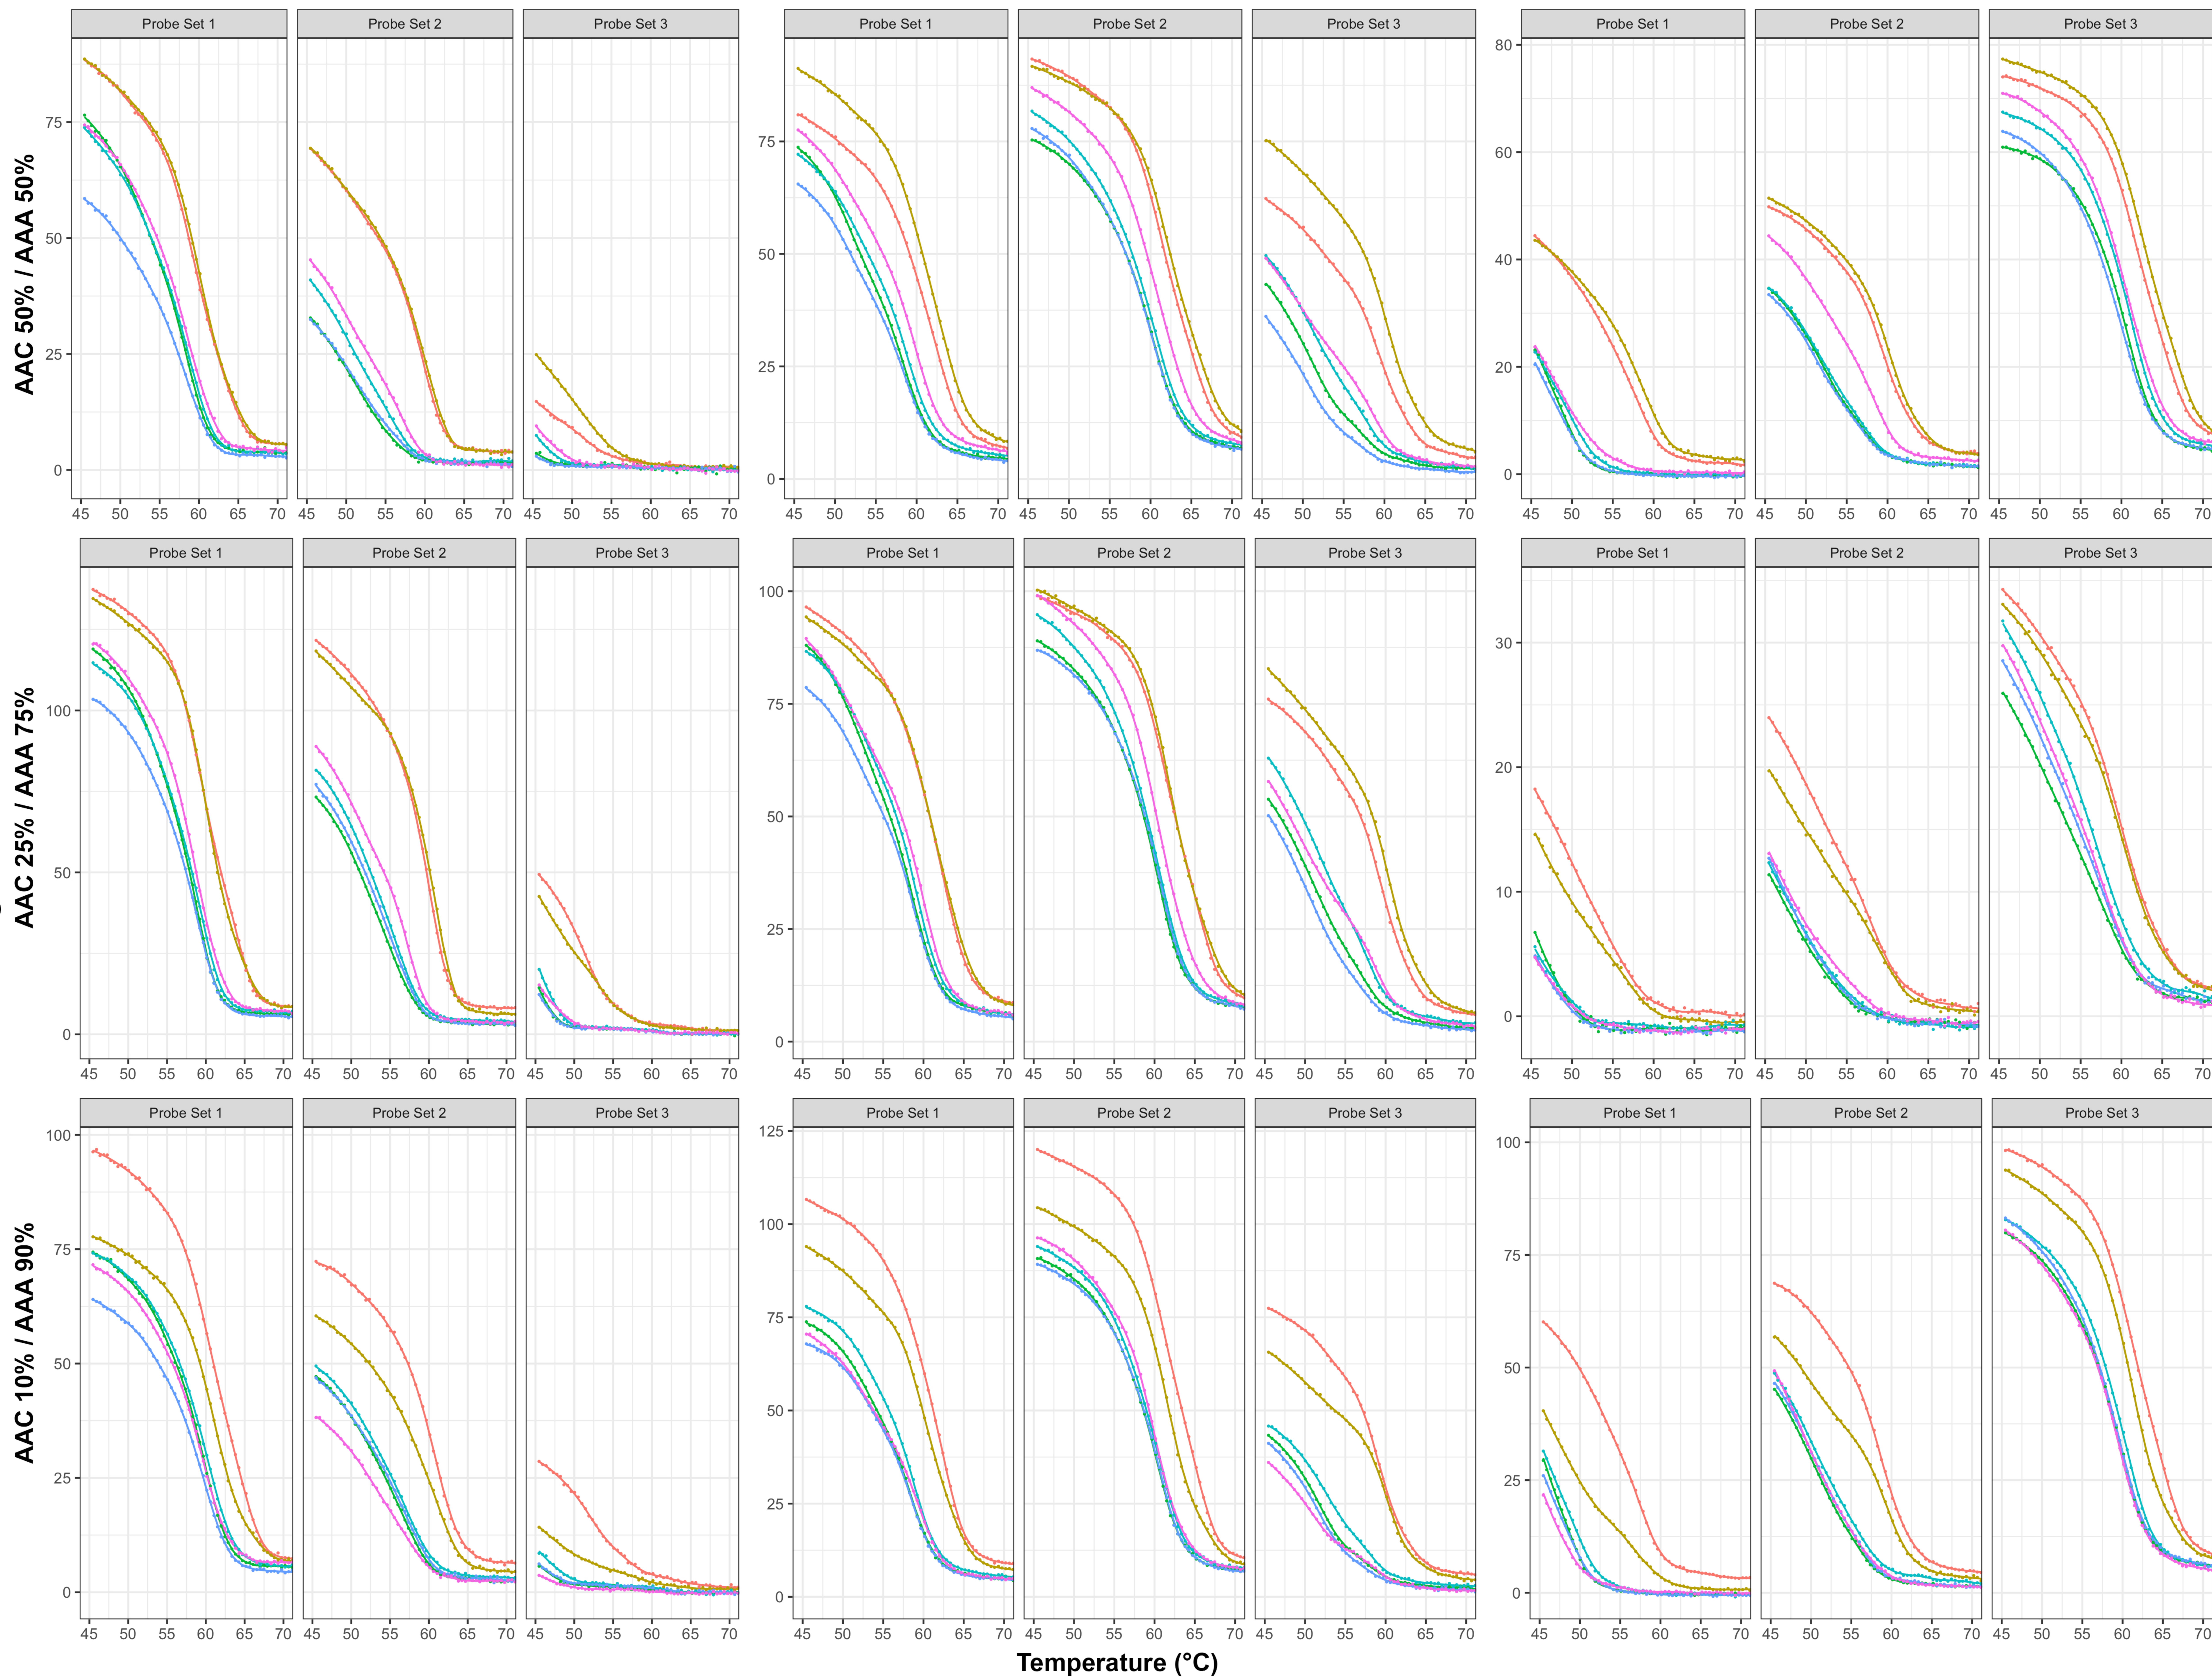

Supplement: mmc3.pdf [file mmc3.pdf]
